# Supplementary material for: Impact of Patient Language Proficiency and Interpreter Service Use on the Quality of Psychiatric Care: A Systematic Review
Source: Atypon-hosted journal article supplement (doi:10.1176/ps.2010.61.8.765), 2010-08-01

## **APPENDIX 1. Search Strategies**

All searches were restricted to English-language articles

### **PubMed:**

("Translating"[Mesh] OR "interpreter" OR "language proficiency") AND ("Mental Health Services"[Mesh] OR "Community Mental Health Services"[Mesh] OR "Mental Disorders"[Mesh] OR "Psychopathology"[Mesh] OR "Psychotherapy"[Mesh] OR "Interview, Psychological"[Mesh] OR "Hospitals, Psychiatric"[Mesh]) NOT ("Psychometrics"[Mesh] OR "Questionnaires"[Mesh] OR "Psychological Tests"[Mesh])

### **PsycInfo:**

(DE "Interpreters" or DE "Foreign Language Translation" or DE "Foreign Languages" or DE "Language Proficiency") AND (DE "Mental Health Services" or DE "Community Mental Health" or DE "Community Mental Health Services" or DE "Mental Disorders" or DE "Psychiatric Symptoms" or DE "Psychotherapy" or DE "Psychological Assessment" or DE "Psychiatric Evaluation" or DE "Psychiatric Hospitalization" or DE "Psychiatric Hospitals" or DE "Psychiatric Patients") NOT (DE "Testing" or DE "Psychometrics" or DE "Test Reliability" or DE "Standardized Tests" or DE "Test Validity" or DE "Questionnaires" or DE "Interview Schedules" or DE "Inventories")

### **CINAHL:**

(MH "Interpreter Services" or MH "translation" or MH "English as a Second Language") AND (MH "Mental Health Services" or MH "Community Mental Health Services" or MH "Mental Disorders" or MH "Psychopathology" or MH "Behavioral Symptoms" or MH "Psychotherapy" or MH "Hospitals, Psychiatric" or MH "Psychiatric Care" or MH "Psychiatric Patients") NOT (MH "Psychological Tests" or MH "Test Construction" or MH "Reliability and Validity" or MH "Psychometrics" or MH "Measurement Issues and Assessments" or MH "Inventories")

*Figure A1*

Selection of Studies Assessing the Impact of Language Proficiency and Interpreter Use on the Quality of Psychiatric Care

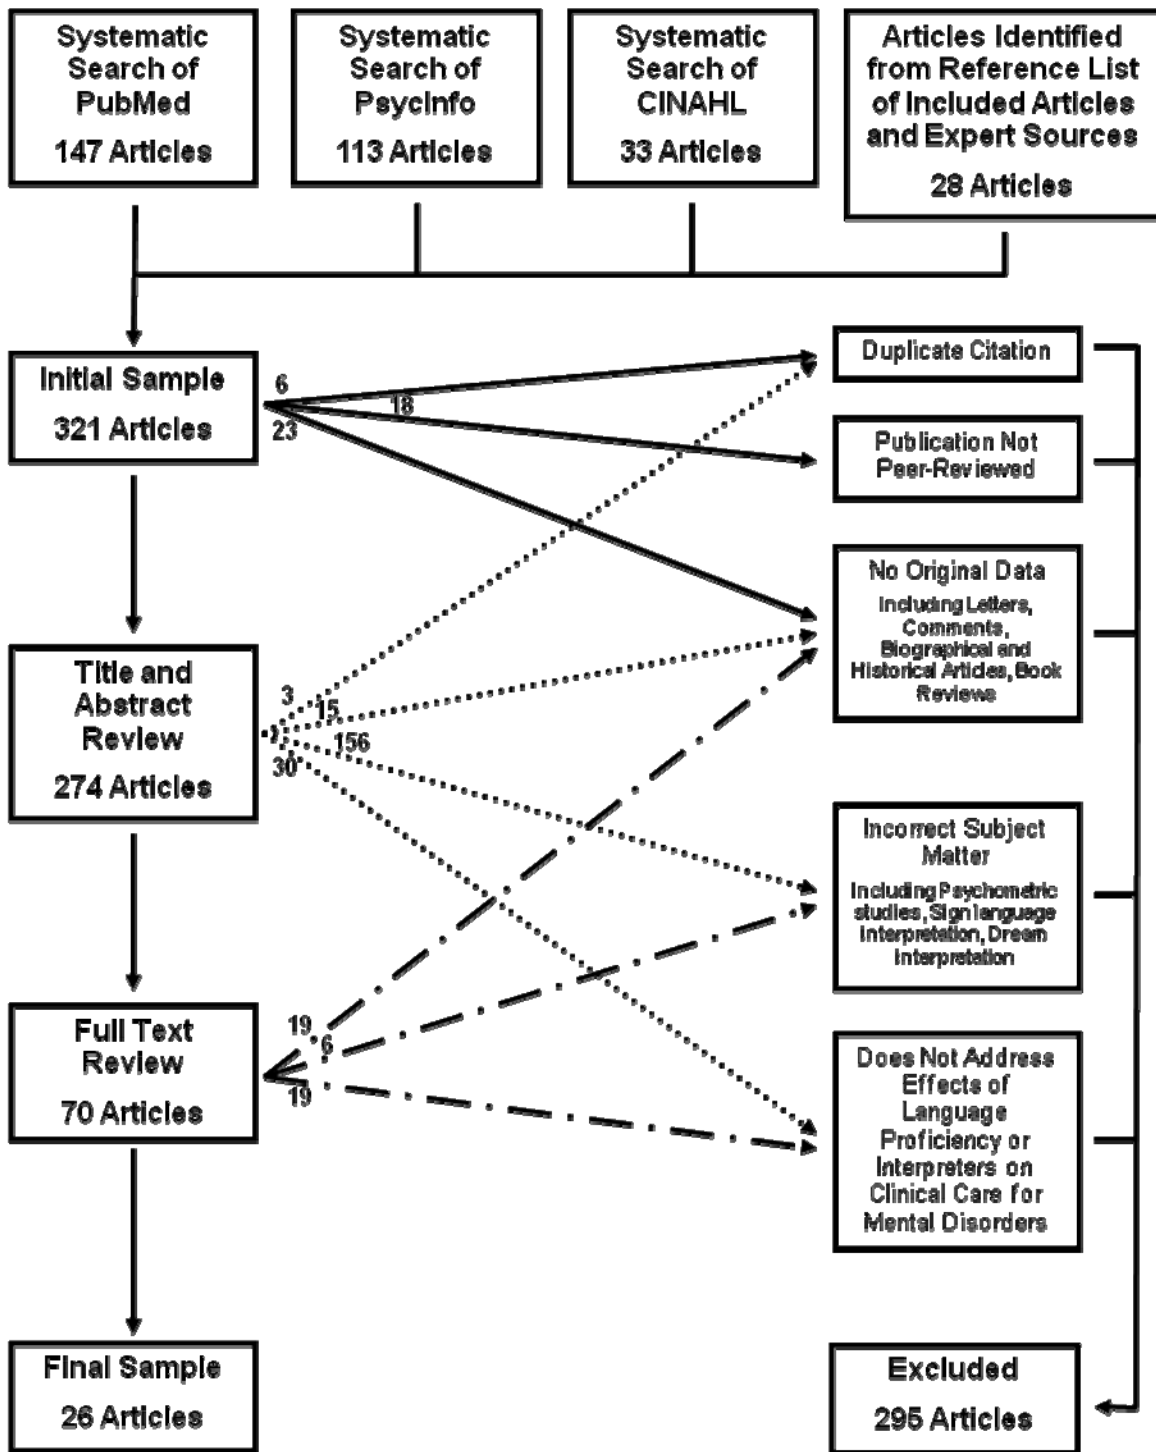

Supplement: pss_61_08_765_01.pdf [file pss_61_08_765_01.pdf]
